# Supplementary material for: Facile Preparation of Gold-Decorated Fe3O4 Nanoparticles for CT and MR Dual-Modal Imaging
Source: MDPI journal article supplement (doi:10.3390/ijms19124049), 2018-12-14
Supplement: s1 [file s1]

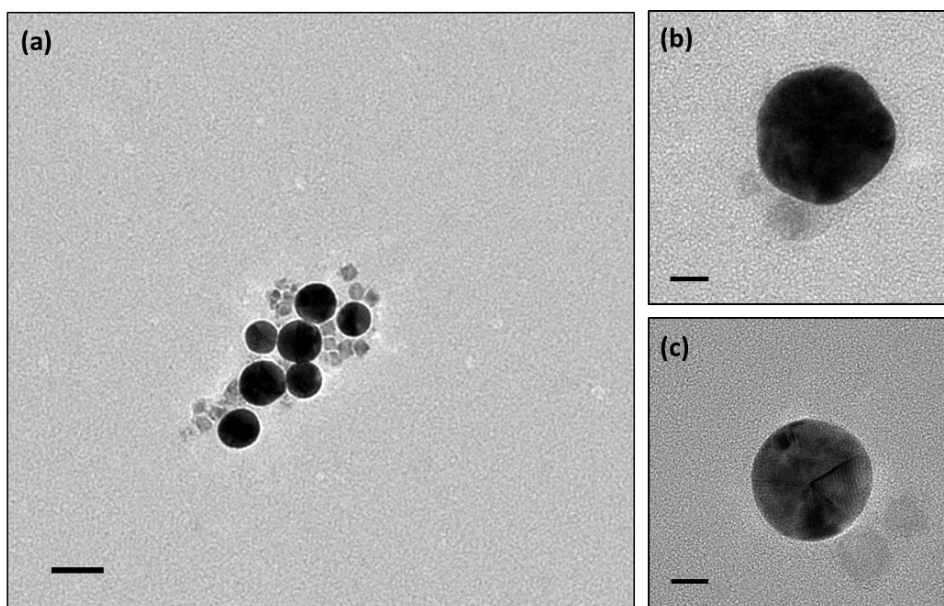

**Figure S1.** (a) TEM image of Au-Fe<sub>3</sub>O<sub>4</sub> nanocomposites. The sizes of Fe<sub>3</sub>O<sub>4</sub> and Au nanoparticles are around 10 nm and 30 nm, respectively; (b,c) TEM images of a single Au-Fe<sub>3</sub>O<sub>4</sub> nanocomposite; The scale bars are 50 nm, 10 nm and 10 nm in (a-c), respectively.
